# Supplementary material for: B cell OX40L supports T follicular helper cell development and contributes to SLE pathogenesis
Source: PubMed Central journal article supplement (PMC5705841; doi:10.1136/annrheumdis-2017-211499), 2017-08-17
Supplement: annrheumdis-2017-211499supp001.pdf [file annrheumdis-2017-211499supp001.pdf]

Supplementary figure S1

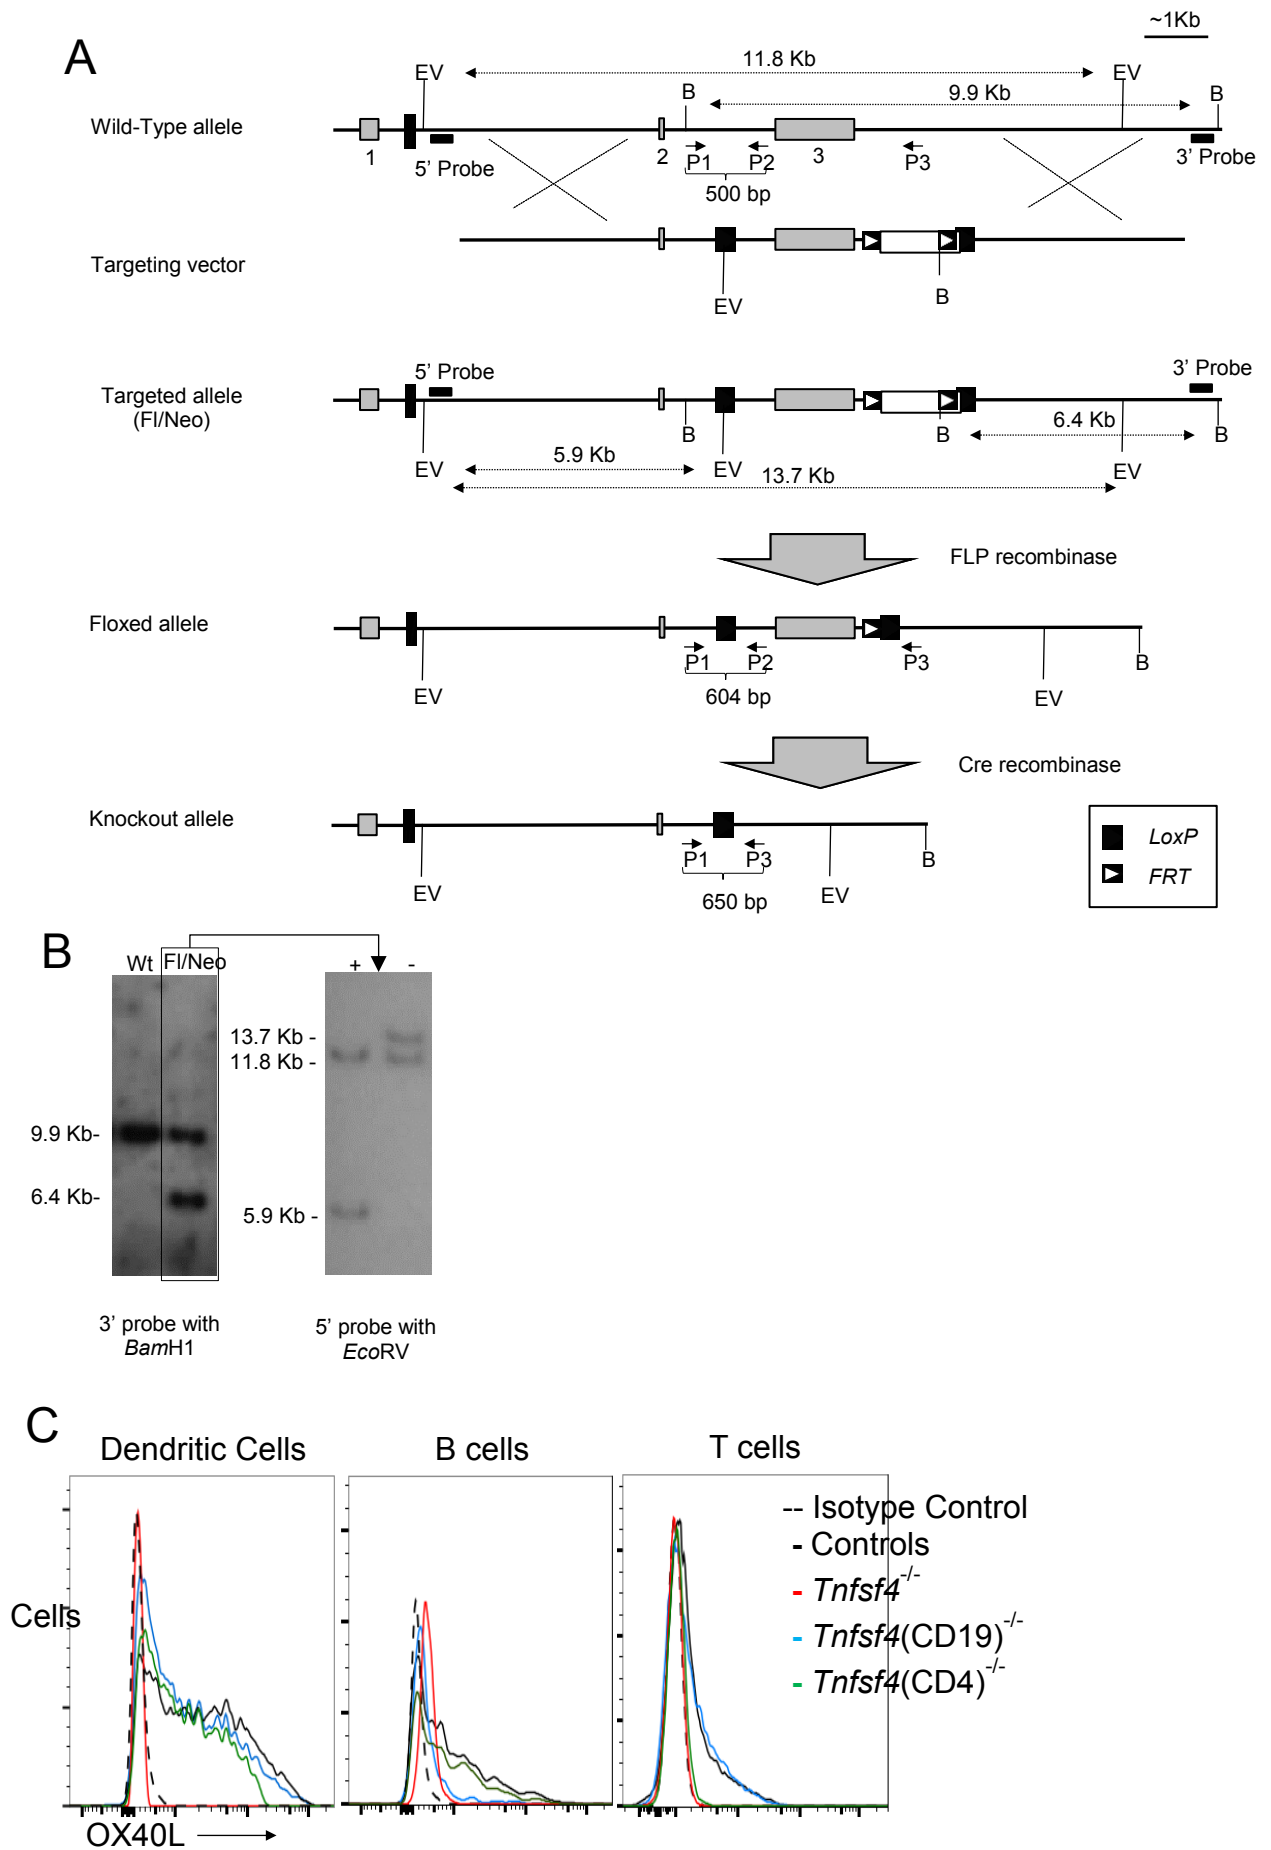

## Supplementary Figure S1 Generation and validation of *Tnfsf4* conditional knockout mouse

**(A)** Schematic representation of the strategy used to generate a conditional *Tnfsf4* mouse. The targeting vector was generated by inserting two loxP sites (black arrows) on either side of exon 3 of the *Tnfsf4* gene. The target allele contained a neomycin-resistant (Neo) positive selectable marker flanked by flippase recombinase recognition target sites (white arrows). Cre recombinase-mediated recombination between the loxP sites results in excision of exon 3, which contains the majority of the gene coding sequence, leading to a null allele. P1, P2 and P3 indicate the location of the primers used for genotyping screening; *Bam*HI (B) and *Eco*RV (EV) are the restriction enzymes used for Southern blot analysis **(B)** of positive ES cells clone with an external 3' and 5' probe. **(C)** FACS analysis of stimulated dendritic- and B- cells for expression of OX40L in wild-type controls (black line), *Tnfsf4*<sup>-/-</sup> (red line), *Tnfsf4*<sup>fl/fl</sup>/CD19-cre (blue line) and *Tnfsf4*<sup>fl/fl</sup>/CD4-cre (green line) mice.

## Supplementary figure S2

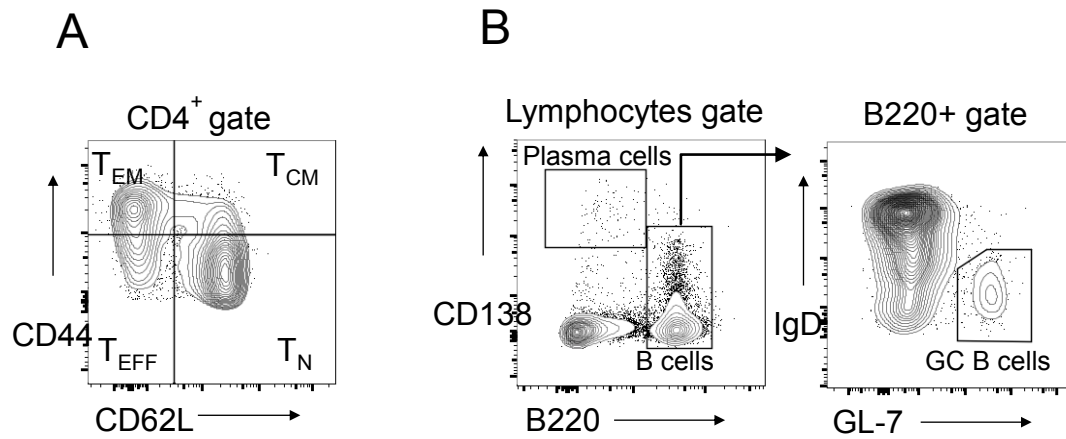

### Supplementary Figure S2 Gating strategy for the analysis of T- and B- cells subsets

(A) Gating strategy for the analysis of T cells subsets. (B) Gating strategy for the analysis of B cells subsets.

Supplementary figure S3

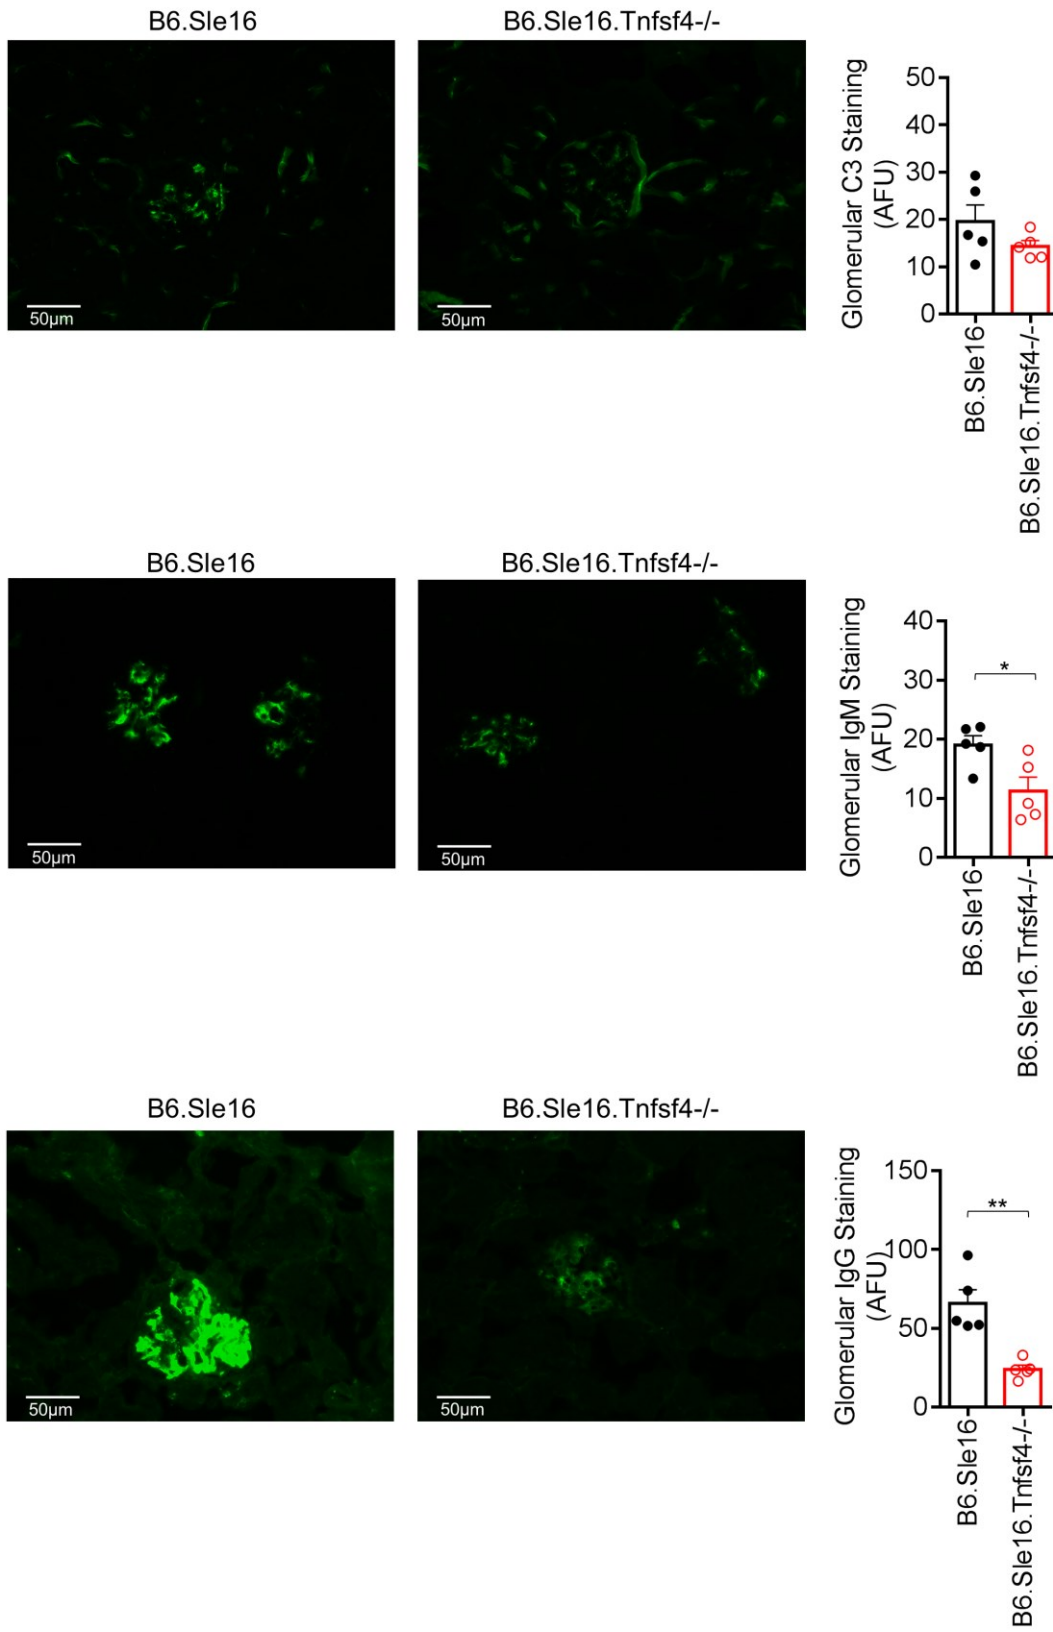

### Supplementary Figure S3 OX40L deficiency ameliorates the phenotype of B6.Sle16 lupus-prone mice

Representative glomerular staining of mouse C3 (Top), IgM (middle) and IgG (Bottom) deposition detected by immunofluorescence in kidney sections of *B6.Sle16* (left column) and *B6.Sle16.Tnfsf4<sup>-/-</sup>* (middle column); magnification 40X, scale bars are provided. Quantitative analysis (left column) of immunofluorescent sections revealed lower deposition of IgM and IgG in *B6.Sle16.Tnfsf4<sup>-/-</sup>* compared to *B6.Sle16* mice. Each symbol represents an individual mouse. Bars indicate the mean  $\pm$ SEM. N.S., not significant; \*P < 0.05, \*\*P < 0.01 and \*\*\*P < 0.001 (Kruskal-Wallis test).

Supplementary Table 1

| Mice               | Primer ID | Primer sequence                   | PCR band size                                                  |
|--------------------|-----------|-----------------------------------|----------------------------------------------------------------|
| <i>Tnfsf4</i> mice | P1        | ATAAGCGGCCGCAGCACATGGCTATATCTTTGA | Wild Type: 500 bp<br>Floxed: 604 bp<br>Knock-out allele: 650bp |
|                    | P2        | CTCGGTACCCAGCTGTGTCTGTGGGGTAGA    |                                                                |
|                    | P3        | CTCGGTACCGAGCACTTGCATAGTAACTGG    |                                                                |
| CD19-Cre           | CRE1      | CGAGTGATGAGGTTCCGAAG              | Wild Type: 170 bp<br>Mutation: 390bp                           |
|                    | CRE2      | TGAGTGAACGAACCTGGTCG              |                                                                |
| CD4-Cre            | CRE Fwd   | CGATGCAACGAGTGATGAGG              | Transgenic mice: 400bp                                         |
|                    | CRE Rev   | GCATTGCTGTCACTTGGTCGT             |                                                                |
